# Supplementary material
Source: Springer Nature journal article supplement (https://www.springermedizin.de/resource/supplementary/12883_2011_506_MOESM3_ESM.pdf/9455290)

**Experiment 1**

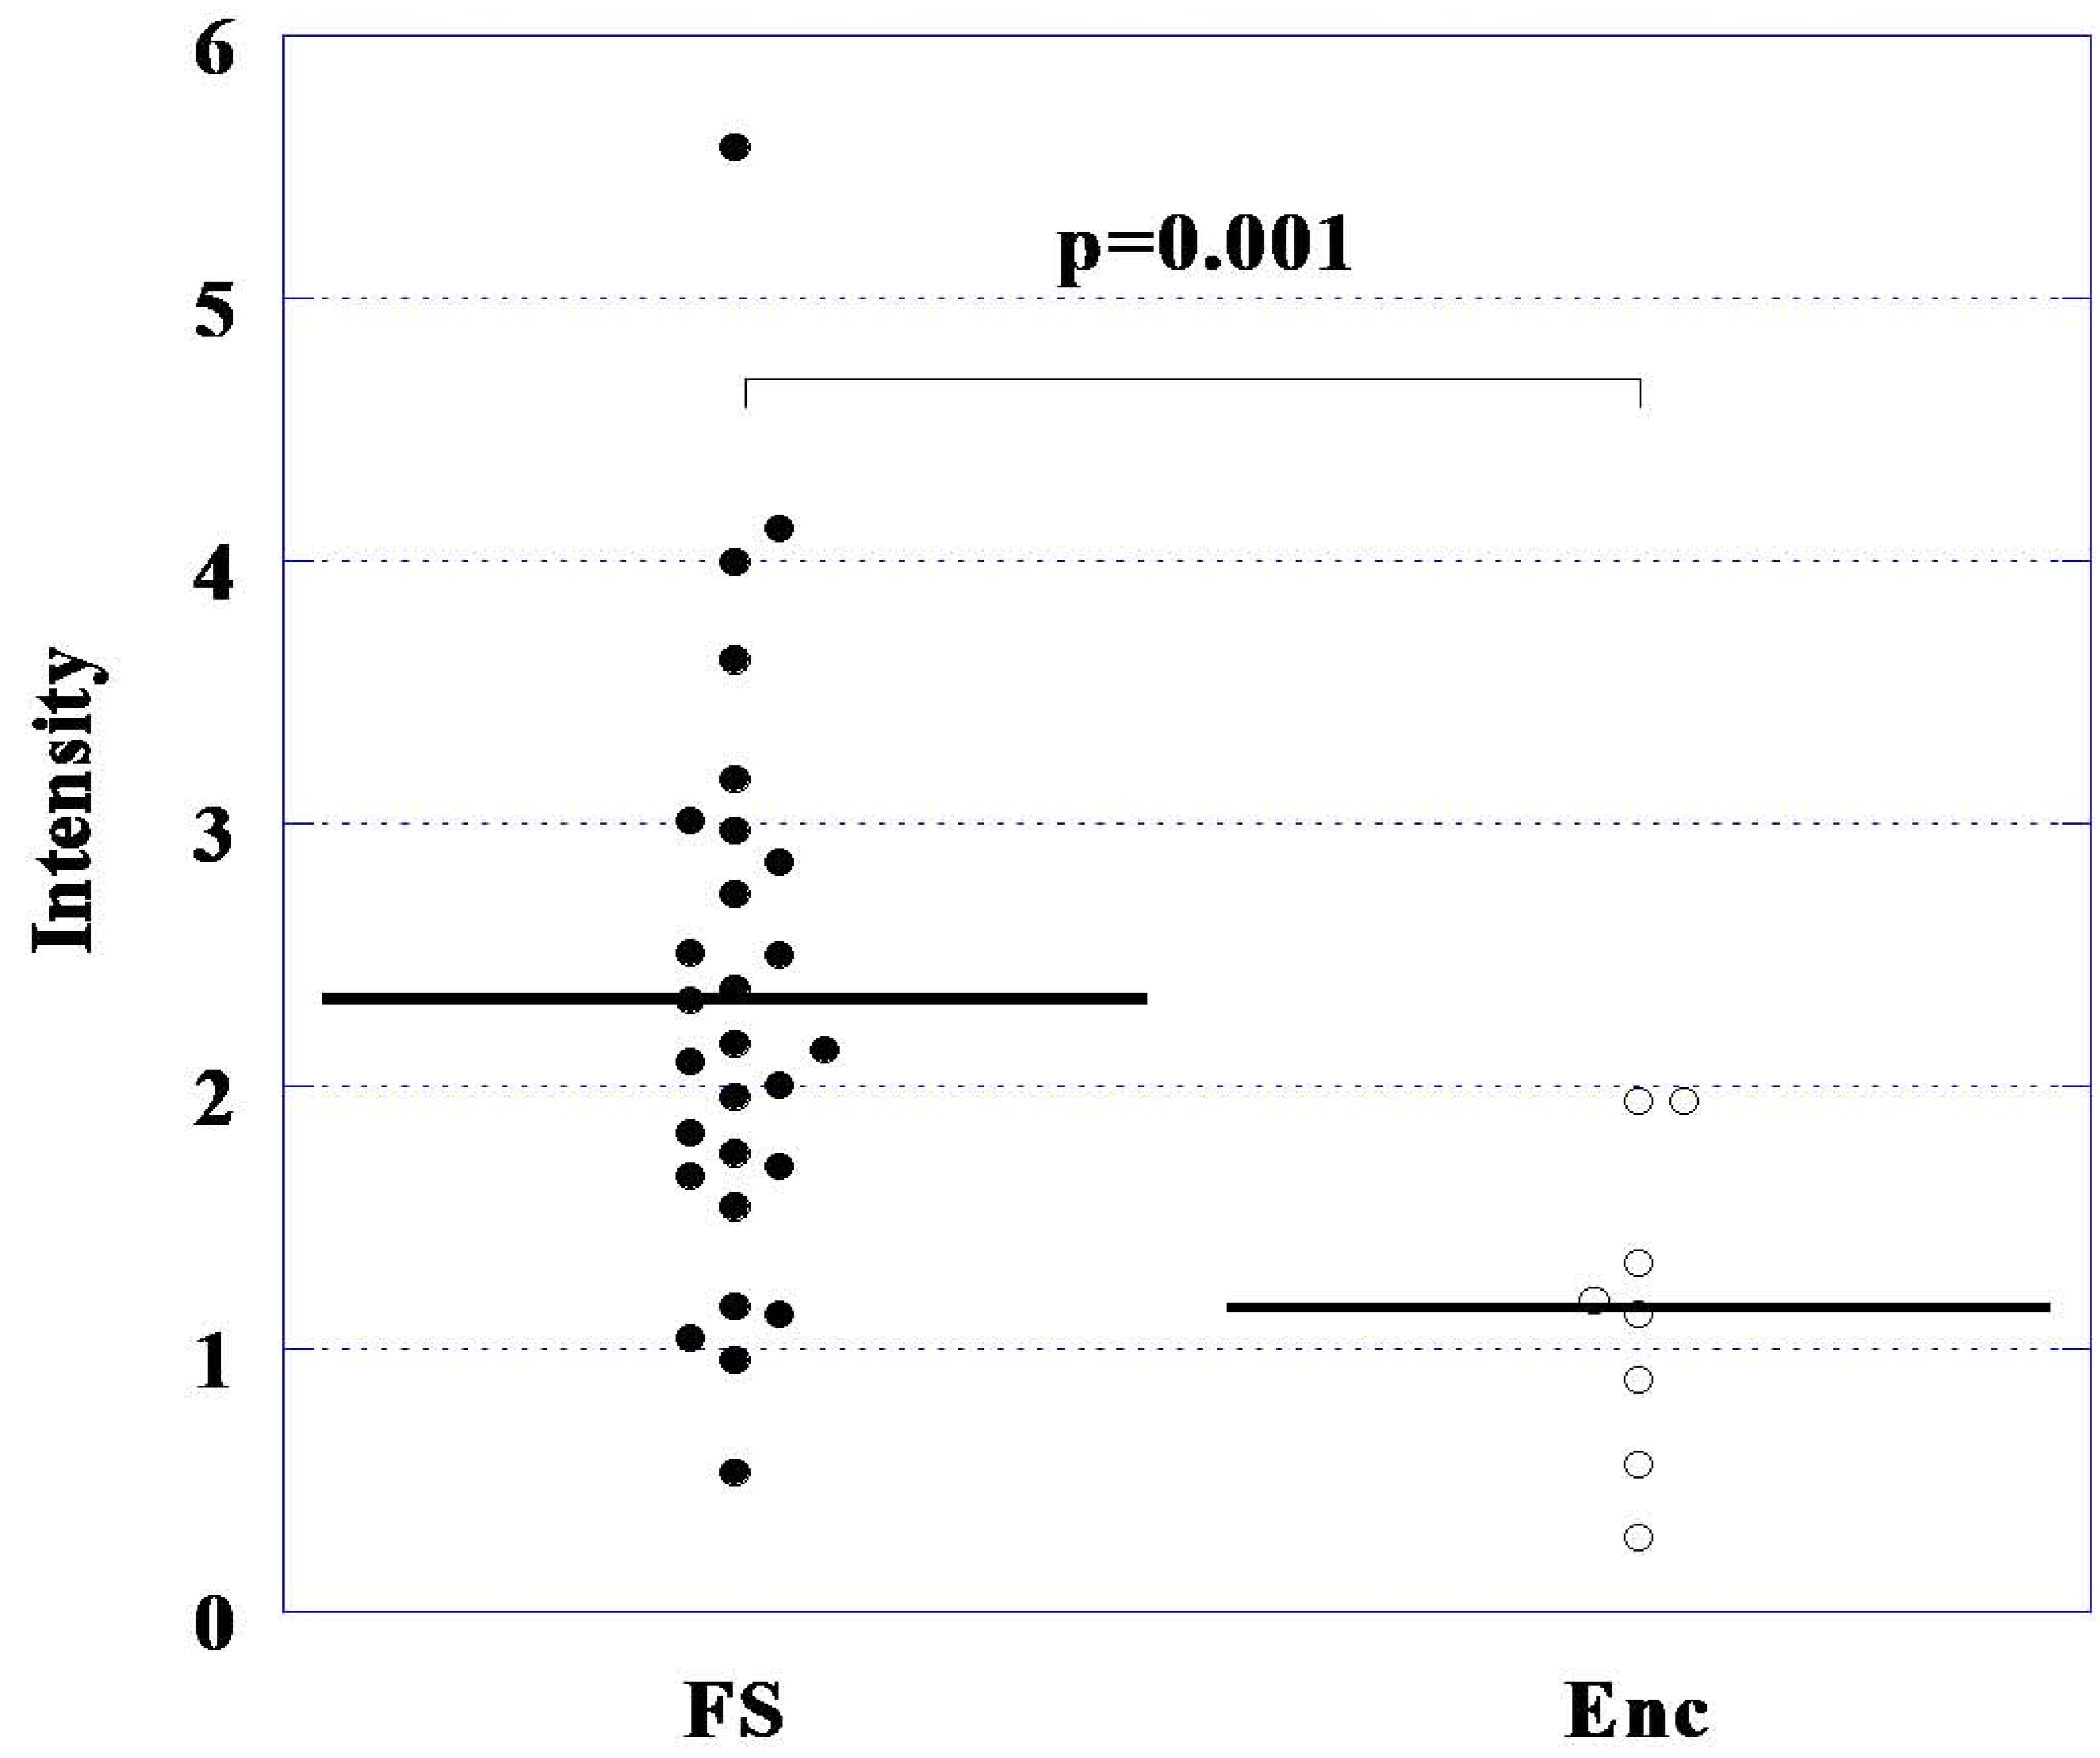

**Experiment 2**

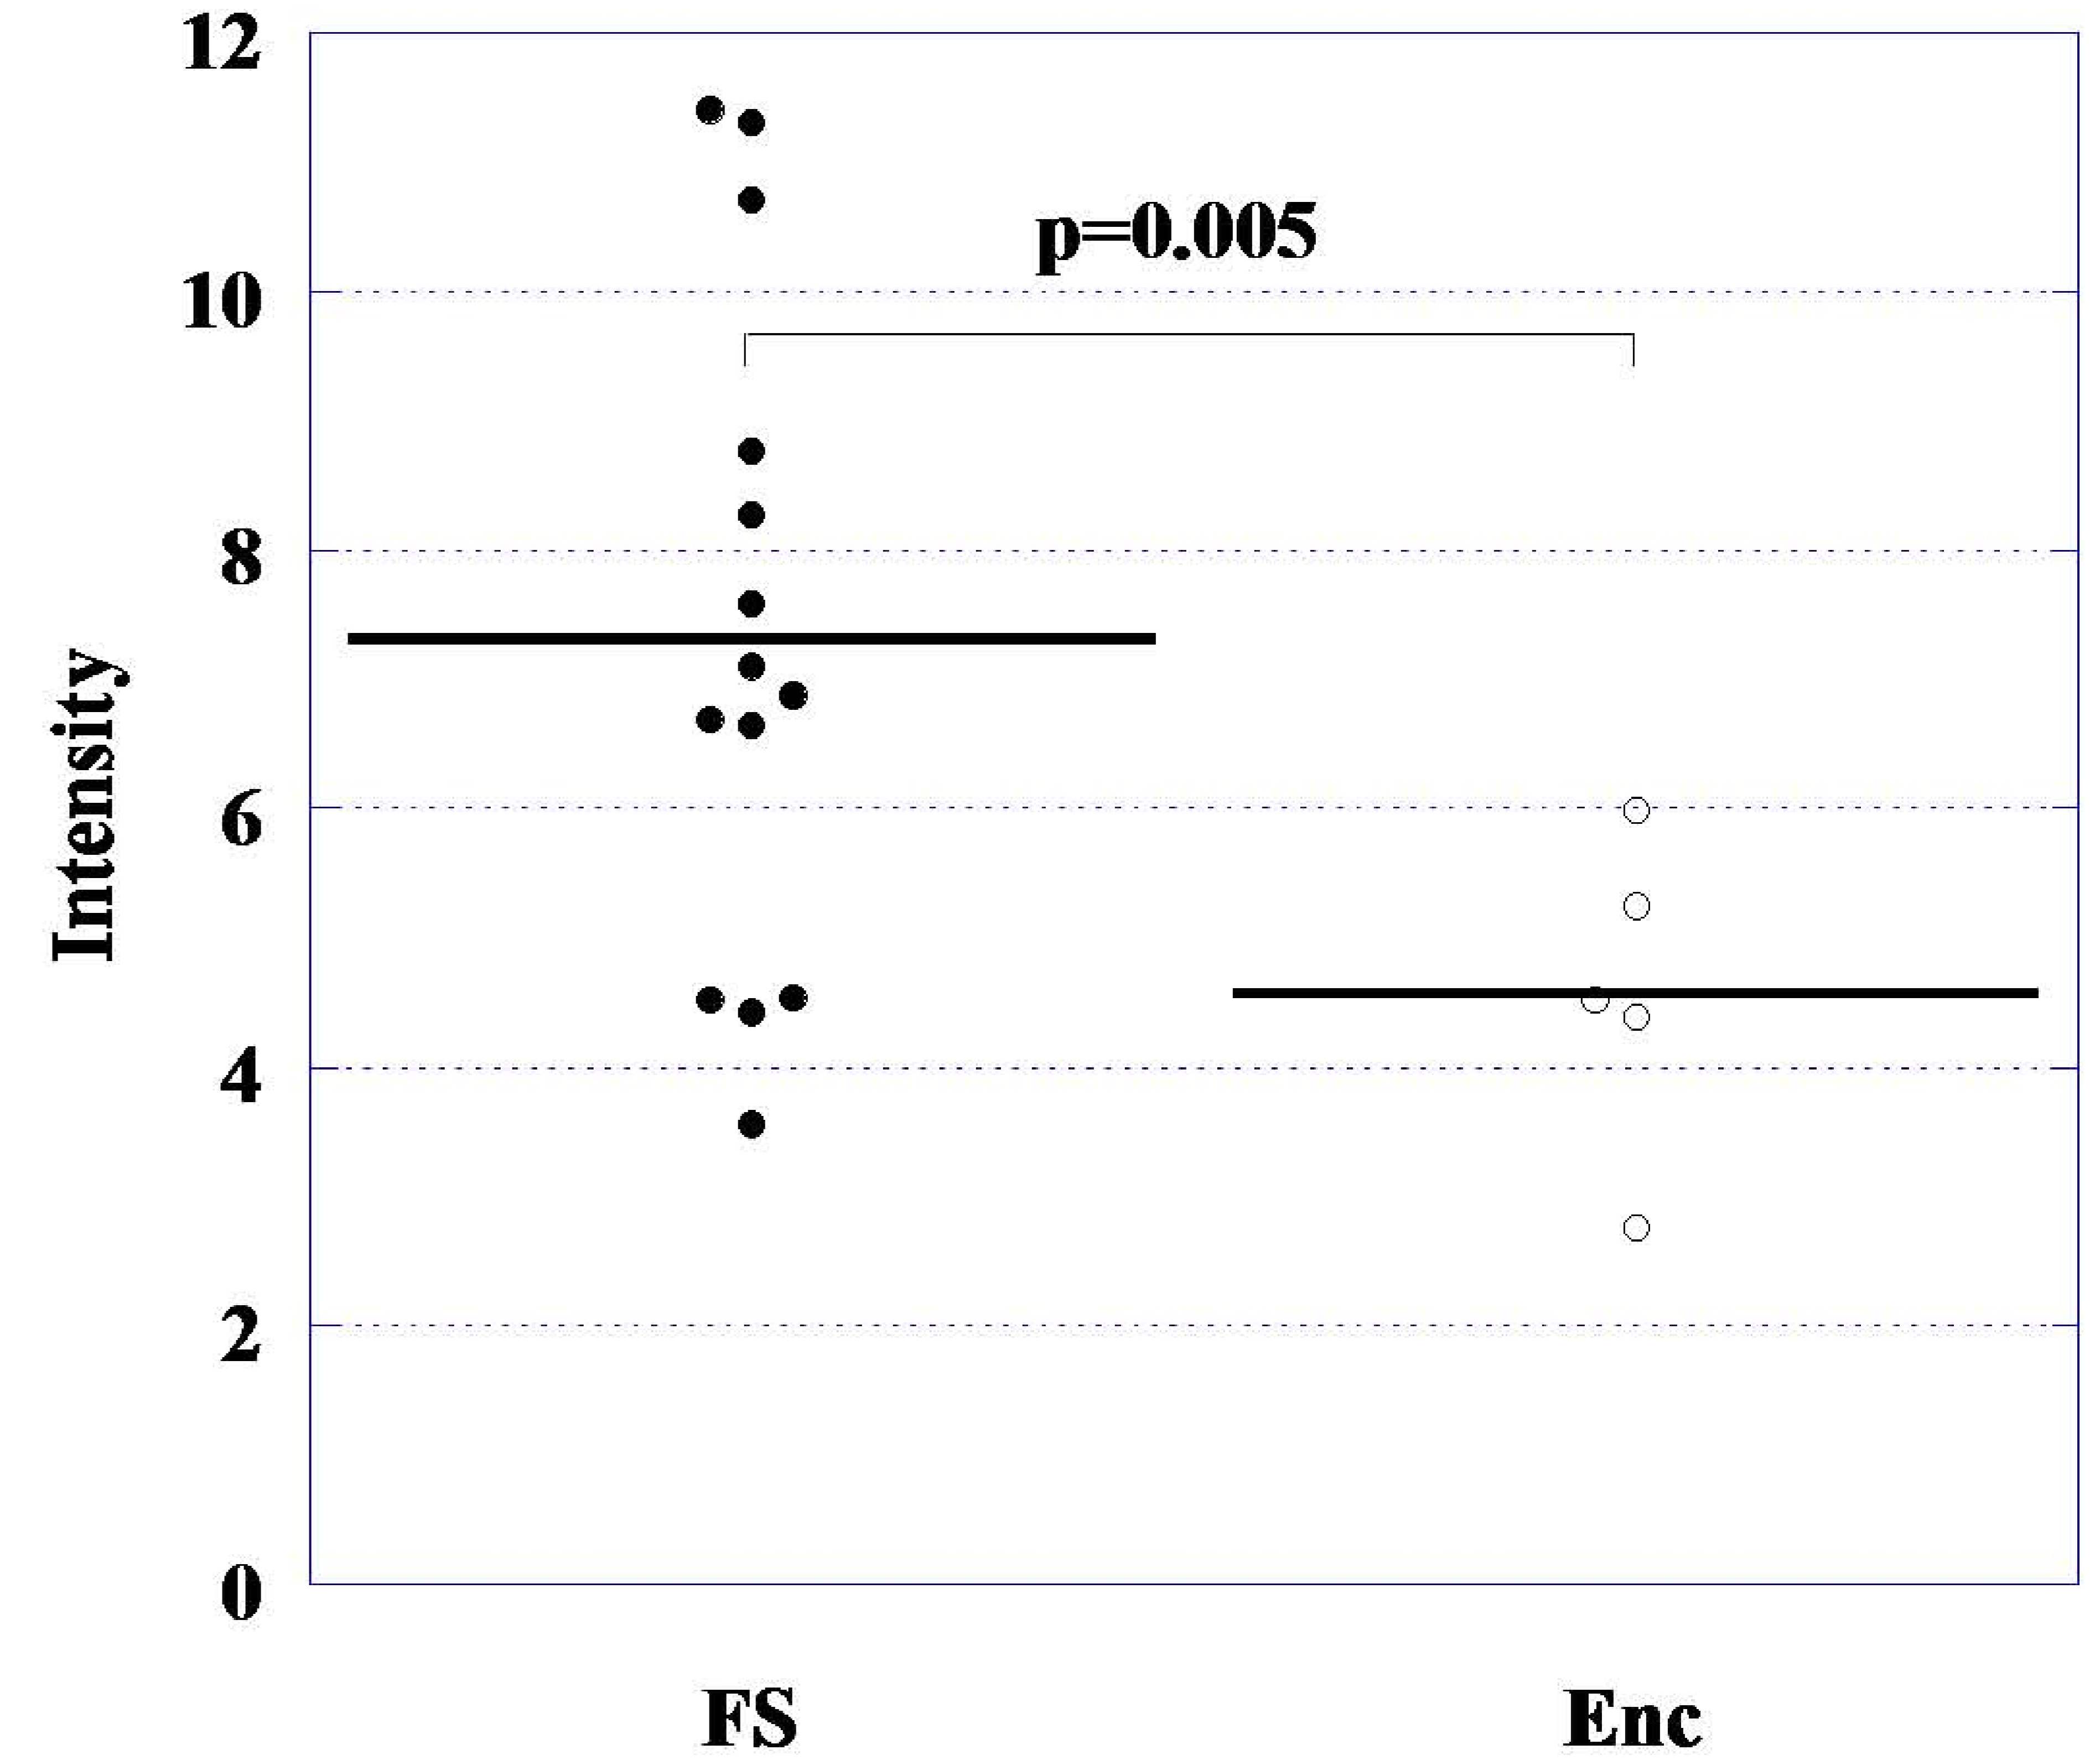

Supplement: MOESM3 [file 9455290]
